# Supplementary material
Source: PubMed Central journal article supplement (PMC4216765)
Supplement: NIHMS593706-supplement-1.pdf [file NIHMS593706-supplement-1.pdf]

## Supplementary Methods

### *Quantitative RT-PCR*

Five pairs of patient-matched samples were of sufficient RNA for quantitative RT-PCR analysis. Total RNA from these samples was reverse transcribed (SuperScript VILO, Life Technologies) in triplicates. The resulting cDNA was analyzed by real-time PCR (Power SYBR Green, Life Technologies; Mastercycler Realplex 4, Eppendorf) for *SGK3*, *SGSM2*, *ELOVL2* and *GAPDH* transcripts following manufacturer's instructions. Relative expression levels of *SGK3*, *SGSM2* and *ELOVL2* were determined by normalizing the amounts of these transcripts to that of *GAPDH*. The sequences of primers used are listed below.

*SGK3*\_forward: 5'-TGTAGATTGGTGGTGCCTTGG-3',  
*SGK3*\_reverse: 5'-CTCCTGGCCTCAAACCTTAGGG-3';  
*SGSM2*\_forward: 5'-CGCGATGCTCTCAATGATCTGC-3',  
*SGSM2*\_reverse: 5'-CCCTGCATCTCGATCATGTCACC-3';  
*ELOVL2*\_forward: 5'-ATCTGGTGGTGTGTCTTGAACCTGG-3',  
*ELOVL2*\_reverse: 5'-ATGGTGTGCGTGATGGTGAGC-3';  
*GAPDH*\_forward: 5'-CACCCACTCCTCCACCTTTG-3',  
*GAPDH*\_reverse: 5'-GAGGTCCACCACCCTGTTG-3'.

### *Effects of PI3K inhibition in tumor xenografts*

Animal experiments were conducted under a Novartis Animal Care and Use Committee-approved protocol at the Novartis animal facility in Emeryville, CA. Briefly, on day 0,  $5 \times 10^4$  A375<sup>Luc</sup> cells resuspended in 20 uL phosphate buffered saline solution were injected intracerebroventricularly into athymic nude mice (female, 6-7 weeks of age, Harlan Laboratories). Starting from day 11, mice with brain metastases were orally given vehicle control

(twice a day), BKM120 (once a day), LGX818 (twice a day) or the combination of BKM120 and LGX818 (once/twice a day), with six mice in each treatment group. Treatments were stopped on day 107 and survival duration analyzed by the Kaplan-Meier method; survival curves were drawn in Prism 6.0 (Graphpad), and median survivals were calculated in SPSS Statistics 21 (IBM).

For western blot analysis, A375<sup>Luc</sup> human melanoma cells were implanted subcutaneously (5,000,000 cells) or intracranially into nude mice. Subcutaneous tumors and tumor-bearing mouse brains were harvested 20 days after implantation. The brains were imaged for bioluminescence, and tumor-containing regions were subjected to serial coronal section. H&E slides were prepared from brain sections and subcutaneous tumors. After pathological review, regions with >50% viable tumor cells were isolated. Protein extraction and western blot analysis on tumor tissues were conducted as previously described (1, 2). The antibodies used in western blotting were the same as in RPPA (Table S4).

#### References

1. Comprehensive molecular portraits of human breast tumours. *Nature*. 2012;490:61-70.
2. Gopal YN, Deng W, Woodman SE, Komurov K, Ram P, Smith PD, et al. Basal and treatment-induced activation of AKT mediates resistance to cell death by AZD6244 (ARRY-142886) in Braf-mutant human cutaneous melanoma cells. *Cancer Res*. 2010;70:8736-47.

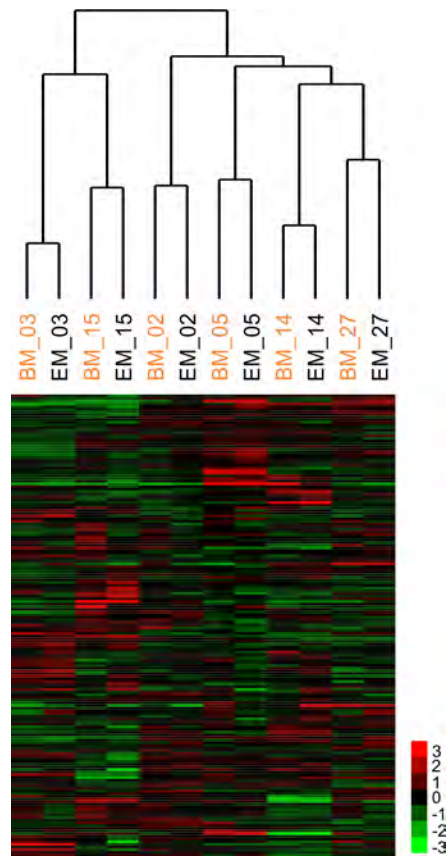

Fig. S1. Gene expression profiling of patient-matched brain and extracranial metastases. Log<sub>2</sub> expression values of 8050 probes in 6 brain metastases (BM, orange) and 6 extracranial metastases (EM, black) from the same patients are hierarchically clustered.

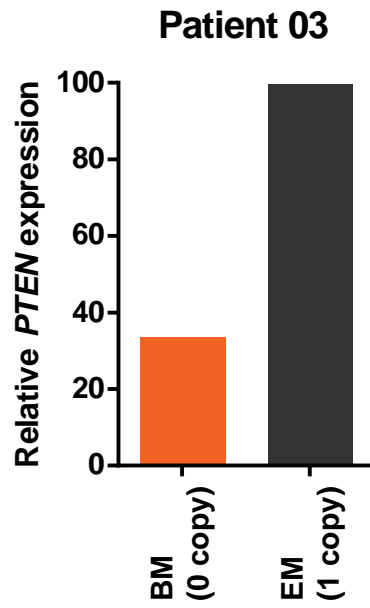

Fig. S2. PTEN gene expression in BM\_03 (homozygous copy loss) and EM\_03 (one copy loss). Gene expression was measured by microarray.

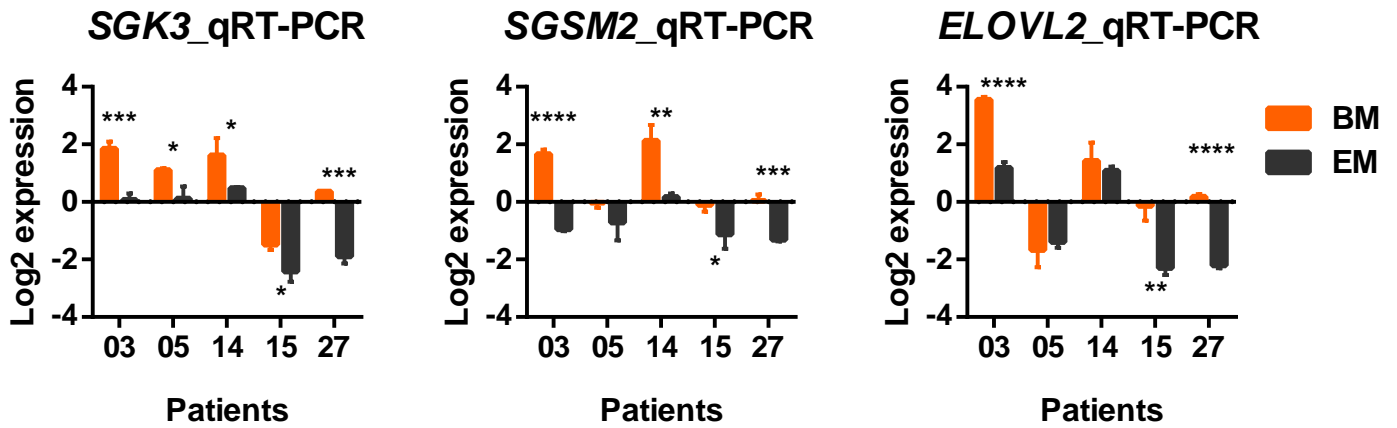

Fig. S3. Quantitative RT-PCR measurement of *SGK3*, *SGSM2* and *ELOVL2* expression in five pairs of brain metastases (BM) and extracranial metastases (EM). Each sample was measured in triplicates (supplementary methods). The differences in gene expression between BM and EM for each of the three genes measured are statistically significant ( $P < 0.0001$  by two-way ANOVA). Asterisks indicate significant gene expression differences between patient-matched BM and EM samples (paired  $t$ -tests). \*  $P < 0.05$ , \*\*  $P < 0.01$ , \*\*\*  $P < 0.001$ , \*\*\*\*  $P < 0.0001$ .

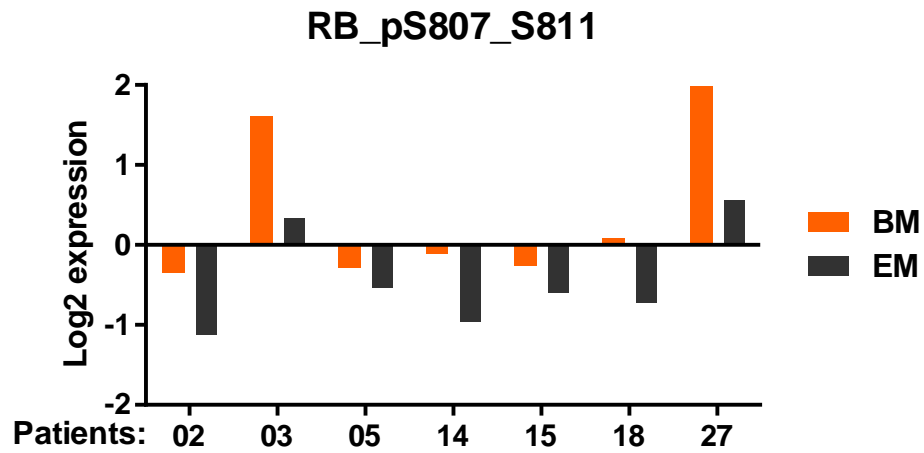

Fig. S4. Log2 expression levels of RB\_pS807\_S811 in seven pairs of matched metastases. Each column represents log2 expression value in one tumor. BM=brain metastasis, EM= extracranial metastasis

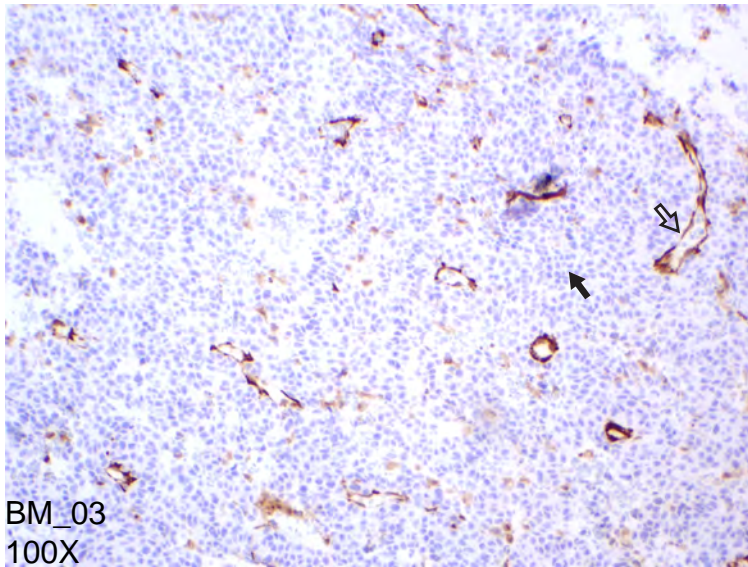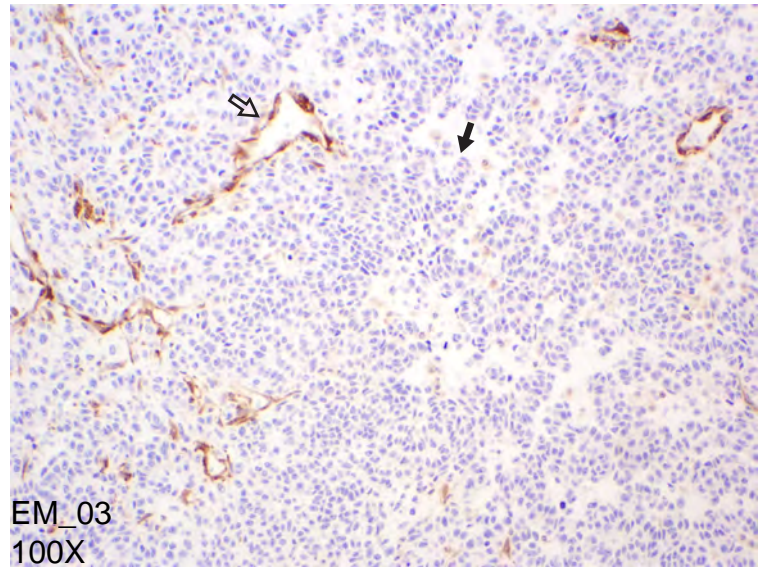

Fig. S5 Examples of PTEN-absent tumors. PTEN IHC of BM\_03 and EM\_03 were photographed at 100X magnification. Solid arrows point to tumor cells and open arrows point to vessels, which are internal controls for positive PTEN staining.

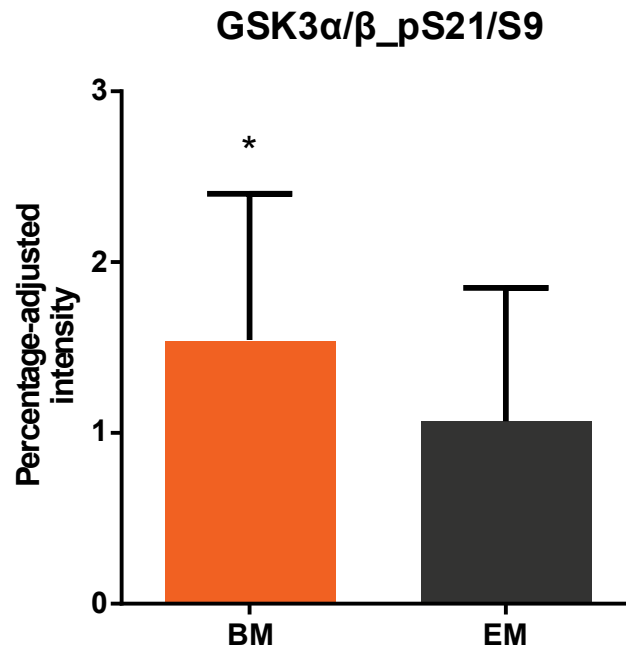

Fig. S6 GSK3 $\alpha$ / $\beta$ \_pS21/S9 IHC staining in 26 pairs of matched brain metastases (BM) and extracranial metastases (EM). Percentage-adjusted intensity was calculated for each tumor by multiplying the average staining intensity to the percentage of positively-stained tumor cells. The average and standard deviation of percentage-adjusted intensity in the 26 BM and the 26 EM are plotted. \*,  $P < 0.05$  in paired t-test.



A)

RB\_pS807\_S811 IHC

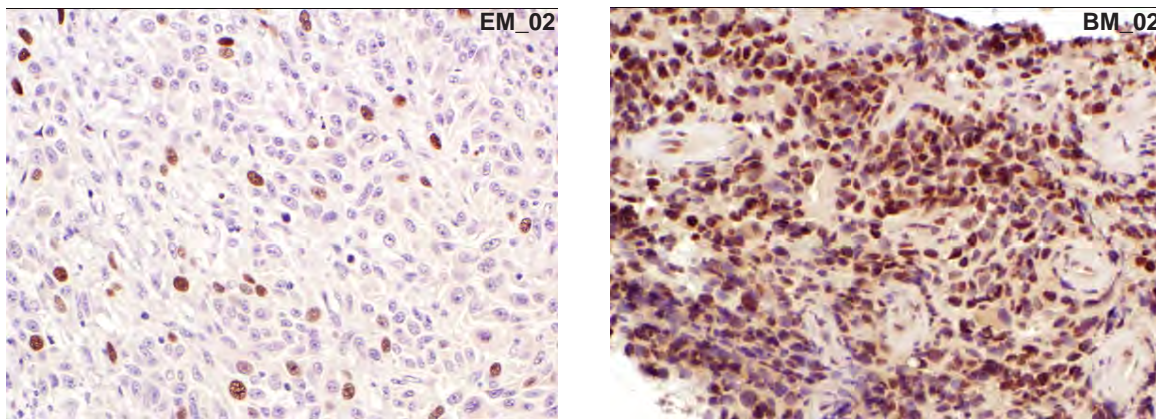

B)

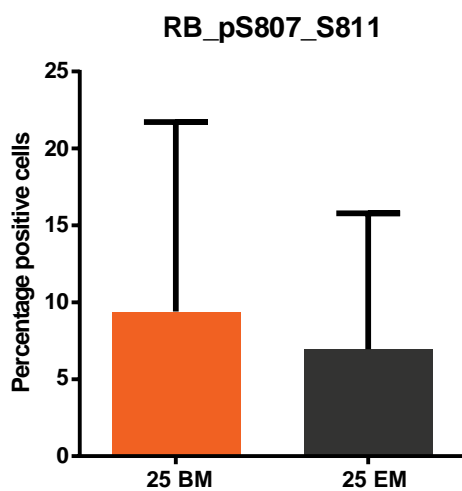

C)

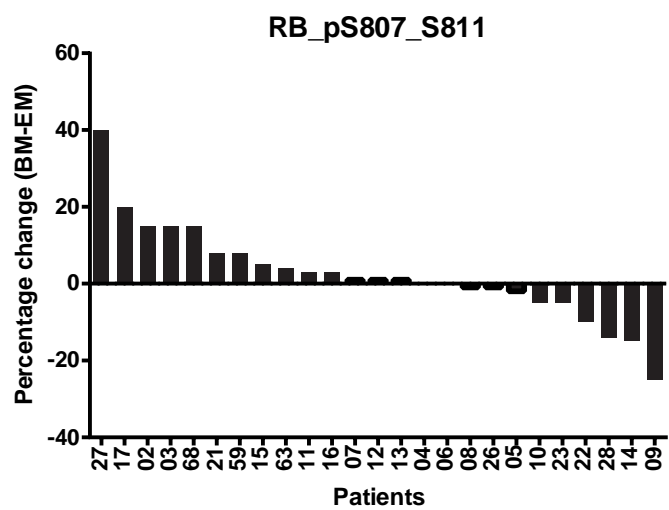

Fig.S7. Results of RB\_pS807\_S811 IHC in 25 pairs of matched brain metastases (BM) and extracranial metastases (EM). **(A)** Images of RB\_pS807\_S811 IHC in the BM and EM of patient 02. **(B)** Mean and standard deviation of the percentage of RB\_pS807\_S811 positive cells in 25 pairs of matched BM and EM. **(C)** The change in percentage of RB\_pS807\_S811 positive cells from EM to BM in each of the 25 patients. Left to right: the largest increase to the largest decrease.

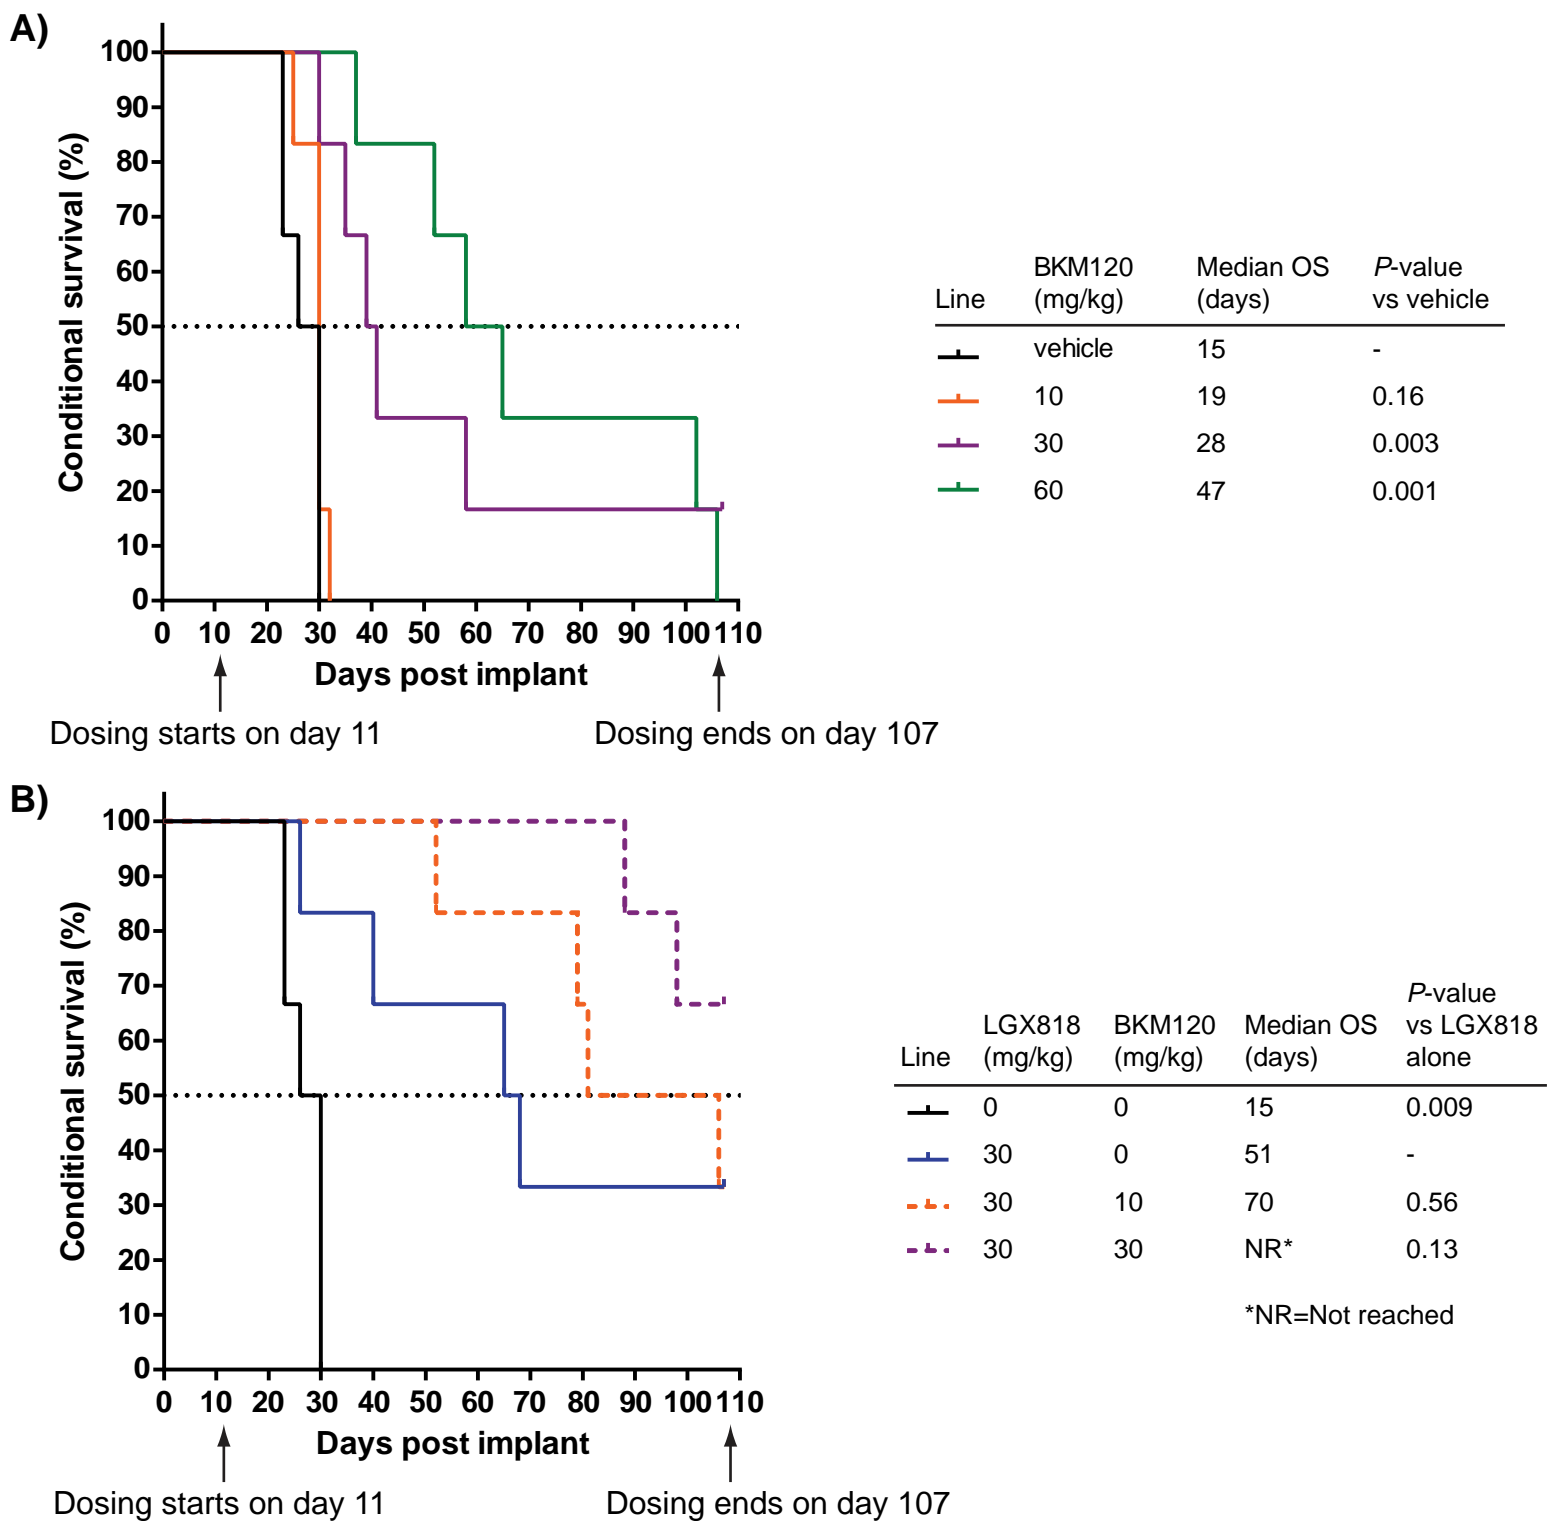

Fig. S8 Kaplan-Meier survival analysis of nude mice with BRAF-mutant melanoma brain metastases treated with BKM120 and/or LGX818. Indicated treatments were started 11 days after injection of BRAF-mutant human A375 melanoma cells, and after confirmation of successful tumor implantation. Mice were treated daily for up to 96 days, and were monitored for overall survival (OS). **(A)** Survival of mice treated with vehicle (black line), BKM120 10 mg/kg (orange), 30 mg/kg (purple), or 60 mg/kg (green). **(B)**, Survival of mice treated with vehicle (black line), LGX818 30 mg/kg alone (blue), LGX818 30mg/kg + BKM120 10 mg/kg (orange, dotted), or LGX818 30 mg/kg + BKM 30 mg/kg (purple, dotted).

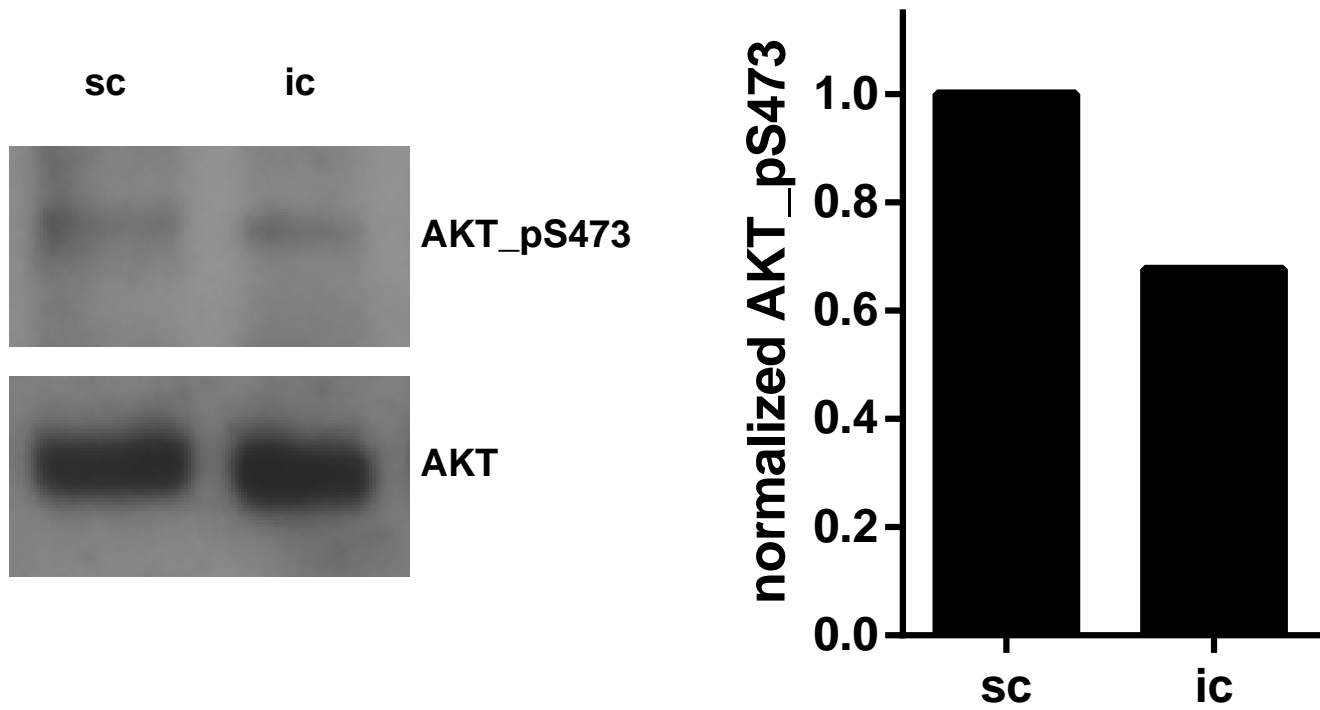

Fig. S9. AKT\_pS473 level in subcutaneously (sc) and intracranially (ic) implanted melanomas. Left: western blot analysis of AKT\_pS473 and AKT protein levels in A375 human melanoma xenografts. Right: quantitation results of western blot analysis, AKT\_pS473 was normalized to AKT.

Table S1. List of clinical samples analyzed

| Tumor   | Patient | Matched or unmatched | Site            | Sample type | Surgery date | Sequenom | CNV profiling | RNA profiling | RPPA | PTEN IHC | P-RB IHC | P-GSK3 IHC |
|---------|---------|----------------------|-----------------|-------------|--------------|----------|---------------|---------------|------|----------|----------|------------|
| BM_02   | 02      | Matched              | Brain           | FFPE/Frozen | 7/3/2003     | Yes      | No            | Yes           | Yes  | Yes      | Yes      | No         |
| EM_02   | 02      | Matched              | Lymph node      | FFPE/Frozen | 1/9/2004     | Yes      | No            | Yes           | Yes  | Yes      | Yes      | No         |
| BM_03   | 03      | Matched              | Brain           | FFPE/Frozen | 9/25/2006    | Yes      | Yes           | Yes           | Yes  | Yes      | Yes      | Yes        |
| EM_03_A | 03      | Matched              | Soft tissue     | Frozen      | 2/28/2006    | No       | No            | Yes           | Yes  | No       | No       | No         |
| EM_03_B | 03      | Matched              | Soft tissue     | FFPE        | 3/9/2007     | Yes      | Yes           | No            | No   | Yes      | Yes      | Yes        |
| BM_04   | 04      | Matched              | Brain           | FFPE        | 4/5/2006     | Yes      | Yes           | No            | No   | Yes      | No       | Yes        |
| EM_04   | 04      | Matched              | Small Intestine | FFPE/Frozen | 3/8/2006     | Yes      | Yes           | Yes           | Yes  | Yes      | No       | Yes        |
| BM_05   | 05      | Matched              | Brain           | FFPE/Frozen | 10/18/2006   | Yes      | Yes           | Yes           | Yes  | Yes      | No       | No         |
| EM_05   | 05      | Matched              | Lymph node      | FFPE/Frozen | 4/10/2009    | Yes      | Yes           | Yes           | Yes  | Yes      | No       | No         |
| BM_06   | 06      | Matched              | Brain           | FFPE        | 5/22/2006    | Yes      | No            | No            | No   | Yes      | No       | No         |
| EM_06_A | 06      | Matched              | Small Intestine | FFPE        | 5/9/2003     | Yes      | No            | No            | No   | Yes      | No       | No         |
| EM_06_B | 06      | Matched              | Small Intestine | Frozen      | 2/7/2005     | No       | No            | Yes           | Yes  | No       | No       | No         |
| BM_07   | 07      | Matched              | Brain           | FFPE        | 5/1/2002     | Yes      | No            | No            | No   | Yes      | No       | No         |
| EM_07   | 07      | Matched              | Lymph node      | FFPE        | 5/17/1999    | Yes      | No            | No            | No   | Yes      | No       | No         |
| BM_08   | 08      | Matched              | Brain           | FFPE        | 9/17/2003    | Yes      | No            | No            | No   | No       | No       | Yes        |
| EM_08   | 08      | Matched              | Lymph node      | FFPE/Frozen | 6/26/2002    | Yes      | No            | No            | Yes  | No       | No       | Yes        |
| BM_09   | 09      | Matched              | Brain           | FFPE        | 12/30/2010   | Yes      | Yes           | No            | No   | Yes      | No       | No         |
| EM_09   | 09      | Matched              | Lung            | FFPE        | 8/17/2010    | Yes      | Yes           | No            | No   | Yes      | No       | No         |
| BM_10   | 10      | Matched              | Brain           | FFPE        | 5/17/2010    | Yes      | Yes           | No            | No   | Yes      | No       | Yes        |
| EM_10   | 10      | Matched              | Lung            | FFPE/Frozen | 1/5/2009     | Yes      | Yes           | Yes           | Yes  | Yes      | No       | Yes        |
| BM_11   | 11      | Matched              | Brain           | FFPE        | 10/13/1992   | Yes      | Yes           | No            | No   | Yes      | No       | No         |
| EM_11   | 11      | Matched              | Spleen          | FFPE        | 3/24/1993    | Yes      | Yes           | No            | No   | Yes      | No       | No         |
| BM_12   | 12      | Matched              | Brain           | FFPE        | 3/21/2001    | Yes      | Yes           | No            | No   | Yes      | No       | No         |
| EM_12   | 12      | Matched              | Lymph node      | FFPE        | 9/28/1992    | Yes      | Yes           | No            | No   | Yes      | No       | No         |
| BM_13   | 13      | Matched              | Brain           | FFPE/Frozen | 3/25/1996    | Yes      | Yes           | Yes           | Yes  | No       | No       | No         |
| EM_13   | 13      | Matched              | Lung            | FFPE        | 12/20/1994   | Yes      | Yes           | No            | No   | No       | No       | No         |
| BM_14   | 14      | Matched              | Brain           | FFPE        | 4/30/2008    | Yes      | No            | No            | No   | Yes      | Yes      | No         |
| EM_14   | 14      | Matched              | Lymph node      | FFPE        | 7/26/2006    | Yes      | No            | No            | No   | Yes      | Yes      | No         |
| BM_15   | 15      | Matched              | Brain           | FFPE/Frozen | 6/5/2009     | Yes      | Yes           | Yes           | Yes  | Yes      | Yes      | No         |
| EM_15   | 15      | Matched              | Soft tissue     | FFPE/Frozen | 4/11/2008    | Yes      | Yes           | Yes           | Yes  | Yes      | Yes      | No         |
| BM_16   | 16      | Matched              | Brain           | FFPE/Frozen | 9/23/1994    | Yes      | Yes           | No            | Yes  | Yes      | No       | No         |
| EM_16   | 16      | Matched              | Small Intestine | FFPE        | 3/28/1995    | Yes      | Yes           | No            | No   | Yes      | No       | No         |
| BM_17   | 17      | Matched              | Brain           | FFPE        | 1/30/2007    | Yes      | No            | No            | No   | Yes      | No       | No         |
| EM_17   | 17      | Matched              | Lymph node      | FFPE/Frozen | 6/30/2005    | Yes      | No            | Yes           | Yes  | Yes      | No       | No         |
| BM_18   | 18      | Matched              | Brain           | FFPE/Frozen | 11/13/2008   | No       | No            | No            | Yes  | No       | No       | No         |
| EM_18   | 18      | Matched              | Bowel           | FFPE/Frozen | 6/25/2008    | No       | No            | Yes           | Yes  | No       | No       | No         |
| BM_20   | 20      | Matched              | Brain           | FFPE/Frozen | 10/16/1998   | No       | No            | Yes           | No   | Yes      | No       | No         |
| EM_20   | 20      | Matched              | Lymph node      | FFPE        | 5/8/1998     | No       | No            | No            | No   | Yes      | No       | No         |
| BM_21   | 21      | Matched              | Brain           | FFPE        | 4/8/2009     | No       | No            | No            | No   | Yes      | No       | No         |
| EM_21   | 21      | Matched              | Lung            | FFPE/Frozen | 1/23/2009    | No       | Yes           | Yes           | Yes  | Yes      | No       | No         |
| BM_22   | 22      | Matched              | Brain           | FFPE        | 1/20/2010    | No       | No            | No            | No   | Yes      | No       | No         |
| EM_22   | 22      | Unmatched            | Spleen          | FFPE/Frozen | 8/3/2009     | No       | No            | Yes           | Yes  | Yes      | No       | No         |
| EM_23   | 23      | Unmatched            | Adrenal         | Frozen      | 5/4/2001     | No       | No            | Yes           | Yes  | No       | No       | No         |
| EM_24   | 24      | Unmatched            | Spleen          | FFPE/Frozen | 9/20/2002    | No       | Yes           | Yes           | Yes  | No       | No       | No         |
| EM_25   | 25      | Unmatched            | Lymph Node      | Frozen      | 8/6/2003     | No       | No            | Yes           | Yes  | No       | No       | No         |
| BM_26   | 26      | Matched              | Brain           | FFPE        | 2/5/2007     | No       | No            | No            | No   | Yes      | No       | No         |
| EM_26   | 26      | Matched              | Lymph Node      | FFPE/Frozen | 12/12/2005   | No       | Yes           | Yes           | Yes  | Yes      | No       | No         |

| Tumor   | Patient | Matched or unmatched | Site                   | Sample type | Surgery date | Sequenom | CNV profiling | RNA profiling | RPPA | PTEN IHC | P-RB IHC | P-GSK3 IHC |
|---------|---------|----------------------|------------------------|-------------|--------------|----------|---------------|---------------|------|----------|----------|------------|
| BM_27_A | 27      | Matched              | Brain (right temporal) | FFPE/Frozen | 10/19/2009   | No       | No            | No            | No   | No       | Yes      | No         |
| BM_27_B | 27      | Matched              | Brain (right frontal)  | Frozen      | 6/4/2009     | No       | No            | Yes           | Yes  | No       | No       | No         |
| EM_27_A | 27      | Matched              | Soft tissue (back)     | FFPE        | 3/14/2005    | No       | No            | No            | No   | No       | Yes      | No         |
| EM_27_B | 27      | Matched              | Soft tissue (chest)    | Frozen      | 10/22/2008   | No       | No            | Yes           | Yes  | No       | No       | No         |
| BM_28   | 28      | Matched              | Brain                  | FFPE        | 4/24/2003    | No       | No            | No            | No   | Yes      | No       | No         |
| EM_28   | 28      | Unmatched            | Bone                   | FFPE/Frozen | 1/23/2002    | No       | Yes           | Yes           | Yes  | Yes      | No       | No         |
| EM_30   | 30      | Unmatched            | Lymph Node             | Frozen      | 3/16/2005    | No       | No            | Yes           | No   | No       | No       | No         |
| EM_31   | 31      | Unmatched            | Lymph Node             | Frozen      | 1/5/2005     | No       | No            | Yes           | No   | No       | No       | No         |
| EM_32   | 32      | Unmatched            | Lymph Node             | Frozen      | 5/21/2004    | No       | No            | Yes           | No   | No       | No       | No         |
| EM_33   | 33      | Unmatched            | Lung                   | Frozen      | 5/6/2005     | No       | No            | Yes           | No   | No       | No       | No         |
| EM_34   | 34      | Unmatched            | Liver                  | Frozen      | 10/6/2003    | No       | No            | Yes           | No   | No       | No       | No         |
| EM_35   | 35      | Unmatched            | Lung                   | Frozen      | 6/2/2003     | No       | No            | Yes           | No   | No       | No       | No         |
| BM_36   | 36      | Unmatched            | Brain                  | Frozen      | 8/3/2005     | No       | No            | Yes           | No   | No       | No       | No         |
| BM_37   | 37      | Unmatched            | Brain                  | Frozen      | 8/24/2005    | No       | No            | Yes           | No   | No       | No       | No         |
| BM_38   | 38      | Unmatched            | Brain                  | Frozen      | 10/15/2008   | No       | No            | Yes           | No   | No       | No       | No         |
| BM_39   | 39      | Unmatched            | Brain                  | Frozen      | 10/10/2007   | No       | No            | Yes           | No   | No       | No       | No         |
| BM_40   | 40      | Unmatched            | Brain                  | Frozen      | 10/28/2008   | No       | No            | Yes           | No   | No       | No       | No         |
| BM_41   | 41      | Unmatched            | Brain                  | Frozen      | 9/18/2007    | No       | No            | Yes           | No   | No       | No       | No         |
| BM_42   | 42      | Unmatched            | Brain                  | Frozen      | 10/23/2007   | No       | No            | Yes           | No   | No       | No       | No         |
| EM_43   | 43      | Unmatched            | Brain                  | Frozen      | 6/26/2006    | No       | No            | Yes           | No   | No       | No       | No         |
| BM_44   | 44      | Unmatched            | Brain                  | Frozen      | 10/31/2007   | No       | No            | Yes           | No   | No       | No       | No         |
| BM_45   | 45      | Unmatched            | Brain                  | Frozen      | 10/1/2008    | No       | No            | Yes           | No   | No       | No       | No         |
| BM_46   | 46      | Unmatched            | Brain                  | Frozen      | 8/14/2009    | No       | No            | Yes           | No   | No       | No       | No         |
| BM_47   | 47      | Unmatched            | Brain                  | Frozen      | 1/28/2011    | No       | No            | Yes           | No   | No       | No       | No         |
| BM_48   | 48      | Unmatched            | Brain                  | Frozen      | 5/26/2010    | No       | No            | Yes           | No   | No       | No       | No         |
| BM_49   | 49      | Unmatched            | Brain                  | Frozen      | 3/16/2010    | No       | No            | Yes           | No   | No       | No       | No         |
| BM_50   | 50      | Unmatched            | Brain                  | Frozen      | 12/11/2009   | No       | No            | Yes           | No   | No       | No       | No         |
| BM_51   | 51      | Unmatched            | Brain                  | Frozen      | 9/20/2010    | No       | No            | Yes           | No   | No       | No       | No         |
| BM_52   | 52      | Unmatched            | Brain                  | Frozen      | 2/5/2010     | No       | No            | Yes           | No   | No       | No       | No         |
| BM_53   | 53      | Unmatched            | Brain                  | Frozen      | 8/23/2011    | No       | No            | Yes           | No   | No       | No       | No         |
| BM_54   | 54      | Unmatched            | Brain                  | Frozen      | 4/4/2011     | No       | No            | Yes           | No   | No       | No       | No         |
| BM_55   | 55      | Unmatched            | Brain                  | Frozen      | 11/10/2010   | No       | No            | Yes           | No   | No       | No       | No         |
| BM_57   | 57      | Matched              | Brain                  | FFPE        | 2/23/2009    | No       | No            | No            | No   | Yes      | No       | Yes        |
| EM_57   | 57      | Matched              | Small Intestine        | FFPE        | 8/18/2010    | No       | Yes           | No            | No   | Yes      | No       | Yes        |
| BM_59   | 59      | Unmatched            | Brain                  | FFPE        | 7/10/2003    | No       | Yes           | No            | No   | No       | No       | No         |
| BM_60   | 60      | Unmatched            | Brain                  | FFPE        | 2/11/2003    | No       | Yes           | No            | No   | No       | No       | No         |
| EM_61   | 61      | Unmatched            | Small Intestine        | FFPE        | 2/4/1998     | No       | Yes           | No            | No   | No       | No       | No         |
| BM_62   | 62      | Unmatched            | Brain                  | FFPE        | 4/1/1998     | No       | Yes           | No            | No   | No       | No       | No         |
| BM_63   | 63      | Unmatched            | Brain                  | FFPE        | 2/9/1998     | No       | Yes           | No            | No   | No       | No       | No         |
| BM_64   | 64      | Unmatched            | Brain                  | FFPE        | 4/20/2002    | No       | Yes           | No            | No   | No       | No       | No         |
| BM_65   | 65      | Unmatched            | Brain                  | FFPE        | 8/21/2001    | No       | Yes           | No            | No   | No       | No       | No         |
| BM_66   | 66      | Unmatched            | Brain                  | FFPE        | 12/5/2005    | No       | Yes           | No            | No   | No       | No       | No         |
| BM_67   | 67      | Unmatched            | Brain                  | FFPE        | 12/15/2008   | No       | Yes           | No            | No   | No       | No       | No         |
| BM_68   | 68      | Matched              | Brain                  | FFPE        | 10/13/1995   | No       | No            | No            | No   | Yes      | Yes      | Yes        |
| EM_68   | 68      | Matched              | Brain                  | FFPE        | 4/14/1995    | No       | No            | No            | No   | Yes      | Yes      | Yes        |
| BM_69   | 69      | Matched              | Brain                  | FFPE        | 6/15/2000    | No       | No            | No            | No   | No       | No       | Yes        |
| EM_69   | 69      | Matched              | Brain                  | FFPE        | 4/30/1999    | No       | No            | No            | No   | No       | No       | Yes        |

Table S2. Clinical features and genetic aberrations of matched samples analyzed by high-throughput techniques

| Patient | Site of extracranial sample | Days between sample acquisitions | Systemic therapies before sample acquisition | Systemic therapies between sample acquisitions | Radiation prior to brain surgery | BRAF/NRAS status      |                       | PTEN copy number |               | PTEN by IHC |         |
|---------|-----------------------------|----------------------------------|----------------------------------------------|------------------------------------------------|----------------------------------|-----------------------|-----------------------|------------------|---------------|-------------|---------|
|         |                             |                                  |                                              |                                                |                                  | BM                    | EM                    | BM               | EM            | BM          | EM      |
| * 02    | Lymph node                  | 190                              | None                                         | Biochemo                                       | No                               | BRAF <sup>V600E</sup> | BRAF <sup>V600E</sup> | n.a              | n.a           | absent      | absent  |
| * † 03  | Soft tissue                 | 374                              | Chemo,cilengitide                            | Chemo                                          | No                               | WT                    | WT                    | homozygous loss  | one copy loss | absent      | absent  |
| * † 04  | Small Intestine             | 28                               | Chemo, high-dose IL-2                        | None                                           | No                               | BRAF <sup>V600E</sup> | BRAF <sup>V600E</sup> | diploid          | diploid       | absent      | absent  |
| * † 05  | Lymph node                  | 905                              | None                                         | None                                           | No                               | BRAF <sup>V600K</sup> | BRAF <sup>V600K</sup> | one copy loss    | one copy loss | absent      | absent  |
| * 06    | Small Intestine             | 1109                             | Alloectin-7                                  | None                                           | No                               | NRAS <sup>Q61K</sup>  | NRAS <sup>Q61K</sup>  | n.a              | n.a           | n.a         | n.a     |
| * 07    | Lymph node                  | 1080                             | None                                         | Vaccine                                        | WBRT, 30Gy                       | BRAF <sup>V600E</sup> | BRAF <sup>V600E</sup> | n.a              | n.a           | present     | present |
| * 08    | Lymph node                  | 448                              | None                                         | biochemo, arsenic trioxide                     | No                               | NRAS <sup>Q61K</sup>  | NRAS <sup>Q61K</sup>  | n.a              | n.a           | n.a         | n.a     |
| * † 09  | Lung                        | 135                              | High-dose IL-2, biochemo, ipi                | None                                           | No                               | BRAF <sup>V600E</sup> | BRAF <sup>V600E</sup> | diploid          | diploid       | present     | present |
| * † 10  | Lung                        | 497                              | None                                         | None                                           | No                               | WT                    | WT                    | one copy loss    | one copy gain | present     | present |
| * † 11  | Spleen                      | 162                              | None                                         | None                                           | No                               | BRAF <sup>V600E</sup> | BRAF <sup>V600E</sup> | one copy loss    | one copy loss | present     | present |
| * † 12  | Lymph node                  | 3096                             | None                                         | Chemo, high-dose IL-2,                         | No                               | BRAF <sup>V600E</sup> | BRAF <sup>V600E</sup> | one copy loss    | one copy loss | present     | present |
| * † 13  | Lung                        | 461                              | None                                         | Chemo                                          | No                               | WT                    | WT                    | diploid          | diploid       | n.a         | n.a     |
| * 14    | Lymph node                  | 644                              | None                                         | None                                           | No                               | WT                    | WT                    | n.a              | n.a           | present     | present |
| * † 15  | Soft tissue                 | 420                              | None                                         | Biochemo, chemo                                | No                               | BRAF <sup>V600E</sup> | BRAF <sup>V600E</sup> | one copy loss    | one copy loss | absent      | absent  |
| * † 16  | Small Intestine             | 186                              | None                                         | None                                           | WBRT, 30Gy                       | WT                    | WT                    | one copy loss    | one copy loss | present     | absent  |
| * 17    | Lymph node                  | 579                              | High-dose IFN $\gamma$                       | Chemo                                          | SRS, 18Gy                        | NRAS <sup>Q61H</sup>  | NRAS <sup>Q61H?</sup> | n.a              | n.a           | present     | present |
| 18      | Bowel                       | 141                              | Chemo, sorafenib and temsirolimus, ipi       | Chemo                                          | SRS, 20Gy                        | n.a                   | n.a                   | n.a              | n.a           | n.a         | n.a     |
| 27      | Soft tissue                 | 1543                             | IFN, biochemo, ipi                           | None                                           | No                               | n.a                   | n.a                   | n.a              | n.a           | n.a         | n.a     |

chemo=chemotherapy

biochemo=biochemotherapy

ipi=ipilimumab

IFN=interferon

WBRT=whole brain radiation

SRS=steorotactic radiosurgery

\* Hotspot mutations profiled by Sequenom

† CNV profiled

Frozen samples subjected to RNA and/or protein extraction are highlighted

  Analyzed by RPPA but not RNA microarray

  Analyzed by both RPPA and RNA microarray

BM=brain metastasis

EM=extracranial metastasis

Table S3. Hotspot mutations analyzed by Sequenom

| Number | Assay.name.(gene_amino.acid_nucleotide) |
|--------|-----------------------------------------|
| 1      | AKT1_E17K_G49A                          |
| 2      | AKT1_G173R_G517C                        |
| 3      | AKT1_K179M_A536T                        |
| 4      | AKT2_E17K_G49A                          |
| 5      | AKT2_G175R_G523C                        |
| 6      | AKT3_E17K_G49A                          |
| 7      | AKT3_G171R_G511A                        |
| 8      | ALK_F1174L_C3522AG                      |
| 9      | ALK_F1174LIV_T3520CAG                   |
| 10     | ALK_F1245C_T3734G                       |
| 11     | ALK_F1245VI_T3733GA                     |
| 12     | ALK_I1171N_T3512A                       |
| 13     | ALK_R1275QL_G3824AT                     |
| 14     | BRAF_D594GV_A1781GT                     |
| 15     | BRAF_E586K_G1756A                       |
| 16     | BRAF_G464EVA_G1391ATC                   |
| 17     | BRAF_G466EVA_G1397ATC                   |
| 18     | BRAF_G466R_G1396CA                      |
| 19     | BRAF_G469EVA_G1406ATC                   |
| 20     | BRAF_G469R_G1405CA                      |
| 21     | BRAF_K601E_A1801G                       |
| 22     | BRAF_L597R_T1790G                       |
| 23     | BRAF_V600_G1800                         |
| 24     | BRAF_V600EAG_T1799ACG_F                 |
| 25     | BRAF_V600EAG_T1799ACG_R                 |
| 26     | BRAF_V600LM_G1798TA                     |
| 27     | CDK4_R24C_C70T                          |
| 28     | CDK4_R24H_G71A                          |
| 29     | CTNNB1_D32AGT_A95CGV                    |
| 30     | CTNNB1_D32HNY_G94CAT                    |
| 31     | CTNNB1_G34EVA_G101ATC                   |
| 32     | CTNNB1_S33APT_T97GCA                    |
| 33     | CTNNB1_S37APT_T109GCA                   |
| 34     | CTNNB1_S37CFY_C110GTA                   |
| 35     | CTNNB1_S45APT_T133GCA                   |
| 36     | CTNNB1_S45CFY_C134GTA                   |
| 37     | CTNNB1_T41APS_A121GCS                   |
| 38     | EGFR_G719_G2155TA                       |
| 39     | EGFR_K860I_A2579T                       |
| 40     | EGFR_L858R_T2573G                       |
| 41     | EGFR_L861_T2582AG                       |
| 42     | EGFR_S720P_T2158C                       |
| 43     | EGFR_T790M_C2369T                       |
| 44     | EGFR_T854I_C2561T                       |
| 45     | EGFR_Y813C_A2438G                       |

| Number | Assay.name.(gene_amino.acid_nucleotide) |
|--------|-----------------------------------------|
| 46     | EPHA3_K761N_G2283                       |
| 47     | FBWX7_R465C_C1393T                      |
| 48     | FBWX7_R465HL_G1394AT                    |
| 49     | FBWX7_R479QL_G1436AT                    |
| 50     | FBWX7_R505CS_C1513TA                    |
| 51     | FBWX7_R505HLP_G1514ATC                  |
| 52     | FGFR2_N549KK_T1647GA                    |
| 53     | FGFR2_S252W_C755G                       |
| 54     | FGFR3_G370C_G1108T                      |
| 55     | FGFR3_G697C_G2089T                      |
| 56     | FGFR3_K650EQ_A1948GC                    |
| 57     | FGFR3_K650MT_A1949TC                    |
| 58     | FGFR3_R248C_C742T                       |
| 59     | FGFR3_S249C_C746G                       |
| 60     | FGFR3_S371C_A1111T                      |
| 61     | FGFR3_Y373C_A1118G                      |
| 62     | FOXL2_C134W_C402G                       |
| 63     | FRAP_R2505P_G7514C                      |
| 64     | FRAP_S2215Y_C6644T                      |
| 65     | GNA11_Q209LP_A626TC                     |
| 66     | GNAQ_Q209H_A627T                        |
| 67     | GNAS_R201H_G602A                        |
| 68     | GNAS_R201SC_C601AT                      |
| 69     | IDH1_R132CGS_C394TGA                    |
| 70     | IDH1_R132HL_G395AT                      |
| 71     | IDH2_R140LQ_G419TA                      |
| 72     | IDH2_R140W_C418T                        |
| 73     | IDH2_R140W_C419T                        |
| 74     | IDH2_R172GW_A514GT                      |
| 75     | IDH2_R172MK_G515TA                      |
| 76     | IDH2_R172S_G516T                        |
| 77     | JAK2_V617F_G1849T                       |
| 78     | KIT_D816GVA_A2447GTC                    |
| 79     | KIT_D816HNY_G2446CAT                    |
| 80     | KIT_K642E_A1924G                        |
| 81     | KIT_L576P_T1727C                        |
| 82     | KIT_N566D_A1696G                        |
| 83     | KIT_N822KNK_T2466GCA                    |
| 84     | KIT_N822YHD_A2464TCG                    |
| 85     | KIT_R634W_C1900T                        |
| 86     | KIT_V559ADG_T1676CAG                    |
| 87     | KIT_V560D_T1679A                        |
| 88     | KIT_V825A_T2474C                        |
| 89     | KIT_Y553N_T1657A                        |
| 90     | KRAS_A146PT_G436CA                      |
| 91     | KRAS_G10R_G28A                          |



| Number | Assay.name.(gene_amino.acid_nucleotide) |
|--------|-----------------------------------------|
| 92     | KRAS_G12DAV_G35ACT                      |
| 93     | KRAS_G12SRC_G34ACT                      |
| 94     | KRAS_G13DAV_G38ACT                      |
| 95     | KRAS_G13SRC_G37ACT                      |
| 96     | KRAS_Q61EKX_C181GAT                     |
| 97     | KRAS_Q61HHE_A183CTG                     |
| 98     | KRAS_Q61LPR_A182TCG                     |
| 99     | MET_H1112_A3335GT                       |
| 100    | MET_H1112Y_C3334T                       |
| 101    | MET_M1268T_T3803C                       |
| 102    | MET_N375S_A1124G                        |
| 103    | MET_R988C_C2962T                        |
| 104    | MET_T1010I_C3029T                       |
| 105    | MET_Y1248C_A3743G                       |
| 106    | MET_Y1248HD_T3742CG                     |
| 107    | NRAS_A146T_G436A                        |
| 108    | NRAS_G12DAV_G35ACT                      |
| 109    | NRAS_G12SRC_G34ACT                      |
| 110    | NRAS_G13DAV_G38ACT                      |
| 111    | NRAS_G13SRC_G37ACT                      |
| 112    | NRAS_Q61EKX_C181GAT                     |
| 113    | NRAS_Q61HHQ_A183TCG                     |
| 114    | NRAS_Q61RPL_A182GCT                     |
| 115    | PDGFRA_D842_G2524TA                     |
| 116    | PDGFRA_D842V_A2525T                     |
| 117    | PDGFRA_N659K_C1977A                     |
| 118    | PDGFRA_N659Y_A1975T                     |
| 119    | PDGFRA_V561D_T1682A                     |
| 120    | PDPK1_D527E_C1581G                      |
| 121    | PDPK1_T354M_C1061T                      |
| 122    | PIK3CA_A1046V_C3137T                    |
| 123    | PIK3CA_E110K_G328A                      |
| 124    | PIK3CA_E418K_G1252A                     |
| 125    | PIK3CA_E453K_G1357A                     |
| 126    | PIK3CA_E542KQ_G1624AC                   |
| 127    | PIK3CA_E542VG_A1625TG                   |
| 128    | PIK3CA_E545AGV_A1634CGT                 |
| 129    | PIK3CA_E545D_G1635CT                    |
| 130    | PIK3CA_E545KQ_G1633AC                   |
| 131    | PIK3CA_F909L_C2727G                     |
| 132    | PIK3CA_H1047RL_A3140GT                  |
| 133    | PIK3CA_H1047RL_A3140GT.[1]              |
| 134    | PIK3CA_H1047Y_C3139T                    |
| 135    | PIK3CA_H701P_A2102C                     |
| 136    | PIK3CA_K111N_G333C                      |
| 137    | PIK3CA_M1043I_G3129ATC                  |

| Number | Assay.name.(gene_amino.acid_nucleotide) |
|--------|-----------------------------------------|
| 138    | PIK3CA_M1043V_A3127G                    |
| 139    | PIK3CA_N345K_T1035A                     |
| 140    | PIK3CA_P539R_C1616G                     |
| 141    | PIK3CA_Q060K_C178A                      |
| 142    | PIK3CA_Q546EK_C1636GA                   |
| 143    | PIK3CA_Q546LPR_A1637TCG                 |
| 144    | PIK3CA_R088Q_G263A                      |
| 145    | PIK3CA_T1025SA_A3073TG                  |
| 146    | PIK3CA_Y1021C_A3062G                    |
| 147    | PIK3CA_Y1021HN_T3061CA                  |
| 148    | PIK3R1_D560Y_G1678T                     |
| 149    | PIK3R1_N564K_C1693AG                    |
| 150    | PRKAG1_R70Q_G209A                       |
| 151    | PRKAG2_N488I_A1463T                     |
| 152    | RET_M918T_T2753C                        |
| 153    | TNK2_E346K_G1036A                       |
| 154    | TNK2_R99Q_G296A                         |

Table S4. Antibodies used in RPPA analysis

| Ab Name               | Gene Name            | Company        | Catalog #   | Ab ID   | Species | Validation Status*                   |
|-----------------------|----------------------|----------------|-------------|---------|---------|--------------------------------------|
| 14-3-3 beta           | YWHAB                | Santa Cruz     | sc-628      | 882.    | Rabbit  | Validated                            |
| 14-3-3 epsilon        | YWHAE                | Santa Cruz     | sc-23957    | 913.1   | Mouse   | Use with Caution                     |
| 14-3-3 zeta           | YWHAZ                | Santa Cruz     | sc-1019     | 883.    | Rabbit  | Validated                            |
| 4E-BP1                | EIF4EBP1             | CST            | 9452        | 2.8     | Rabbit  | Validated                            |
| 4E-BP1_pS65           | EIF4EBP1             | CST            | 9456        | 3.1     | Rabbit  | Validated                            |
| 4E-BP1_pT37_T46       | EIF4EBP1             | CST            | 9459        | 6.4     | Rabbit  | Validated                            |
| 53BP1                 | TP53BP1              | CST            | 4937        | 985.1   | Rabbit  | Validated                            |
| ACC_pS79              | ACACA<br>ACACB       | CST            | 3661        | 13.4    | Rabbit  | Validated                            |
| ACC1                  | ACACA                | Epitomics      | 1768-1      | 14.1    | Rabbit  | Under evaluation                     |
| ACVRL1                | ACVRL1               | Epitomics      | 2940-1      | 1086.10 | Rabbit  | Use with Caution                     |
| Akt                   | AKT1<br>AKT2<br>AKT3 | CST            | 4691        | 1084.11 | Rabbit  | Validated                            |
| Akt_pS473             | AKT1<br>AKT2<br>AKT3 | CST            | 9271        | 23.10   | Rabbit  | Validated                            |
| Akt_pT308             | AKT1<br>AKT2<br>AKT3 | CST            | 2965        | 1154    | Rabbit  | Validated                            |
| AMPK_alpha            | PRKAA1               | CST            | 2532        | 39.4    | Rabbit  | Use with Caution                     |
| AMPK_pT172            | PRKAA1               | CST            | 2535        | 40.6    | Rabbit  | Validated                            |
| Annexin_VII           | ANXA7                | BD Biosciences | 610668      | 1142.1  | Mouse   | Validated                            |
| AR                    | AR                   | Epitomics      | 1852-1      | 756.1   | Rabbit  | Validated                            |
| Bad_pS112             | BAD                  | CST            | 9291        | 63.7    | Rabbit  | Validated                            |
| Bak                   | BAK1                 | Epitomics      | 1542-1      | 71.2    | Rabbit  | Use with Caution                     |
| Bax                   | BAX                  | CST            | 2772        | 73.5    | Rabbit  | Validated                            |
| Bcl-2                 | BCL2                 | Dako           | Dako M0887  | 80.1    | Mouse   | Validated                            |
| Bcl-xL                | BCL2L1               | CST            | 2762        | 85.5    | Rabbit  | Validated                            |
| Beclin                | BECN1                | Santa Cruz     | sc-10086    | 87.1    | Goat    | Use with Caution                     |
| beta-Catenin          | CTNNB1               | CST            | 9562        | 75.3    | Rabbit  | Validated                            |
| Bid                   | BID                  | Epitomics      | 1008-1      | 88.1    | Rabbit  | Use with Caution                     |
| Bim                   | BCL2L11              | Epitomics      | 1036-1      | 90.1    | Rabbit  | Validated                            |
| B-Raf                 | BRAF                 | Santa Cruz     | sc-5284     | 96.2    | Mouse   | Use with Caution                     |
| BRCA2                 | BRCA2                | CST            | 9012        | 761.1   | Rabbit  | Use with Caution                     |
| Caspase-7_cleavedD198 | CASP7                | CST            | 9491        | 109.6   | Rabbit  | Use with Caution                     |
| Caveolin-1            | CAV1                 | CST            | 3238        | 114.1   | Rabbit  | Validated                            |
| CD31                  | PECAM1               | Dako           | M0823       | 127.1   | Mouse   | Validated                            |
| CD49b                 | ITGA2                | BD Biosciences | 611016      | 937.1   | Mouse   | Validated                            |
| CDK1                  | CDC2                 | CST            | 9112        | 1007.5  | Rabbit  | Validated                            |
| Chk1                  | CHEK1                | CST            | 2360        | 1203.3  | Mouse   | Use with caution                     |
| Chk1_pS345            | CHEK1                | CST            | 2348        | 903.7   | Rabbit  | Use with caution                     |
| Chk2                  | CHEK2                | CST            | 3440        | 146.1   | Mouse   | Validated                            |
| Chk2_pT68             | CHEK2                | CST            | 2197        | 147.2   | Rabbit  | Use with Caution                     |
| cIAP                  | BIRC2                | Millipore      | 07-759      | 930.1   | Rabbit  | Caution                              |
| c-Jun_pS73            | JUN                  | CST            | 9164        | 155.5   | Rabbit  | Validated                            |
| c-Kit                 | KIT                  | Epitomics      | 1522        | 157     | Rabbit  | Validated                            |
| Claudin-7             | CLDN7                | Novus          | NB100-91714 | 852.1   | Rabbit  | Validated                            |
| c-Met_pY1235          | MET                  | CST            | 3129        | 727.5   | Rabbit  | Validated                            |
| c-Myc                 | MYC                  | Santa Cruz     | sc-764      | 1143.1  | Rabbit  | Use with Caution                     |
| Collagen_VI           | COL6A1               | Santa Cruz     | SC-20649    | 171.1   | Rabbit  | Validated                            |
| C-Raf                 | RAF1                 | Millipore      | 05-739      | 803     | Rabbit  | Validated                            |
| C-Raf_pS338           | RAF1                 | CST            | 9427        | 179.4   | Rabbit  | Validated                            |
| Cyclin_B1             | CCNB1                | Epitomics      | 1495-1      | 192.1   | Rabbit  | Validated                            |
| Cyclin_D1             | CCND1                | Santa Cruz     | SC-718      | 194.1   | Rabbit  | Validated                            |
| Cyclin_E1             | CCNE1                | Santa Cruz     | SC-247      | 201.1   | Mouse   | Validated                            |
| DJ-1                  | PARK7                | Abcam          | ab76008     | 891.1   | Rabbit  | Validated                            |
| Dvl3                  | DVL3                 | CST            | 3218        | 940.1   | Rabbit  | Validated                            |
| E-Cadherin            | CDH1                 | CST            | 3195        | 1099.10 | Rabbit  | Validated                            |
| eEF2                  | EEF2                 | CST            | 2332        | 1060.3  | Rabbit  | Use with Caution                     |
| eEF2K                 | EEF2K                | CST            | 3692        | 1061.2  | Rabbit  | Validated                            |
| EGFR                  | EGFR                 | CST            | 2232        | 1120.15 | Rabbit  | Validated                            |
| EGFR_pY1068           | EGFR                 | CST            | 2234        | 217.13  | Rabbit  | Use with caution;<br>also sees pHer2 |
| EGFR_pY1173           | EGFR                 | Epitomics      | 1124        | 221.3   | Rabbit  | Validated                            |
| eIF4E                 | EIF4E                | CST            | 9742        | 722.3   | Rabbit  | Validated                            |
| eIF4G                 | EIF4G1               | CST            | 2498        | 1124.3  | Rabbit  | Use with Caution                     |

|                         |                |                     |             |                |        |                                        |
|-------------------------|----------------|---------------------|-------------|----------------|--------|----------------------------------------|
| ER-alpha                | ESR1           | Lab Vision          | RM-9101-S   | 238.6          | Rabbit | Validated                              |
| ER-alpha_pS118          | ESR1           | Epitomics           | 1091-1      | 241.1          | Rabbit | Validated                              |
| FASN                    | FASN           | Cell Signaling      | 3180        | 1156.00        | Rabbit | Validated                              |
| Fibronectin             | FN1            | Epitomics           | 1574-1      | 262.1          | Rabbit | Validated                              |
| FOXO3a                  | FOXO3          | CST                 | 2497        | 1122.6         | Rabbit | Use with Caution                       |
| FOXO3a_pS318_S321       | FOXO3          | CST                 | 9465        | 270.1          | Rabbit | Use with Caution                       |
| FoxM1                   | FOX1           | CST                 | 5436        | 1123.1         | Rabbit | Validated                              |
| G6PD                    | G6PD           | Santa Cruz          | sc-373887   | 1155           | Mouse  | Validated                              |
| Gab2                    | GAB2           | CST                 | 3239        | 943.1          | Rabbit | Validated                              |
| GAPDH                   | GAPDH          | Ambion              | AM4300      | 274.11         | Mouse  | Caution                                |
| GATA3                   | GATA3          | BD Biosciences      | 558686      | 764.1          | Mouse  | Validated                              |
| GSK3_pS9                | GSK3A<br>GSK3B | CST                 | 9336        | 1082.12        | Rabbit | Validated                              |
| GSK3-alpha-beta         | GSK3A<br>GSK3B | Santa Cruz          | SC-7291     | 284.2          | Mouse  | Validated                              |
| GSK3-alpha-beta_pS21_S9 | GSK3A<br>GSK3B | CST                 | 9331        | 285.12         | Rabbit | Validated                              |
| HER2                    | ERBB2          | Lab Vision          | MS-325-P1   | 1038.2         | Mouse  | Validated                              |
| HER2_pY1248             | ERBB2          | R&D Systems         | AF1768      | 1075.1         | Rabbit | Use with caution;<br>likely sees pEGFR |
| HER3                    | ERBB3          | Santa Cruz          | sc-285      | 911.1          | Rabbit | Validated                              |
| HER3_pY1289             | ERBB3          | CST                 | 4791        | 728.12         | Rabbit | Use with Caution                       |
| Heregulin               | NRG1           | CST                 | 2573        | 890.1          | Rabbit | Validated                              |
| IGFBP2                  | IGFBP2         | CST                 | 3922        | 335.1          | Rabbit | Validated                              |
| INPP4B                  | INPP4B         | CST                 | 4039        | 1065.1         | Rabbit | Validated                              |
| IRS1                    | IRS1           | Upstate (Millipore) | 06-248      | 802.1          | Rabbit | Validated                              |
| JNK_pT183_pY185         | MAPK8          | CST                 | 4668        | 888.5          | Rabbit | Validated                              |
| JNK2                    | MAPK9          | CST                 | 4672        | 380.1          | Rabbit | Use with Caution                       |
| Lck                     | LCK            | CST                 | 2752        | 397.2          | Rabbit | Validated                              |
| MAPK_pT202_Y204         | MAPK1<br>MAPK3 | CST                 | 4377        | 405.3          | Rabbit | Validated                              |
| MEK1                    | MAP2K1         | Epitomics           | 1235-1      | 417.1          | Rabbit | Validated                              |
| MEK1_pS217_S221         | MAP2K1         | CST                 | 9154        | 1076.3         | Rabbit | Validated                              |
| MIG-6                   | ERRFI1         | Sigma               | WH0054206M1 | 1062.1         | Mouse  | Validated                              |
| mTOR                    | FRAP1          | CST                 | 2983        | 444.3          | Rabbit | Validated                              |
| mTOR_pS2448             | FRAP1          | CST                 | 2971        | 446.14         | Rabbit | Use with caution                       |
| MYH11                   | MYH11          | SDI / Novus         | 21370002    | 1139.1         | Rabbit | Validated                              |
| Myosin IIa_pS1943       | MYH9           | CST                 | 5026        | 1160           | Rabbit | Validated                              |
| N-Cadherin              | CDH2           | CST                 | 4061        | 452.1          | Rabbit | Validated                              |
| NDRG1_pT346             | NDRG1          | CST                 | 3217        | 1126           | Rabbit | Validated                              |
| NF2                     | NF2            | SDI                 | 2271.00.02  | 1046.1         | Rabbit | Use with Caution                       |
| NF-kB-p65_pS536         | NFKB1          | CST                 | 3033        | 457.4          | Rabbit | Use with Caution                       |
| Notch1                  | NOTCH1         | CST                 | 3268        | 1064.1         | Rabbit | Validated                              |
| N-Ras                   | NRAS           | Santa Cruz          | sc-31       | 1136.1         | Mouse  | Validated                              |
| p21                     | CDKN1A         | Santa Cruz          | SC-397      | 470.1          | Rabbit | Validated                              |
| p27                     | CDKN1B         | Epitomics           | 1591-1      | 897.1          | Rabbit | Validated                              |
| p27_pT157               | CDKN1B         | R&D                 | AF1555      | 842.1          | Rabbit | Use with Caution                       |
| p27_pT198               | CDKN1B         | Abcam               | ab64949     | 878.1          | Rabbit | Validated                              |
| p38_MAPK                | MAPK14         | CST                 | 9212        | 478.10         | Rabbit | Validated                              |
| p38_pT180_Y182          | MAPK14         | CST                 | 9211        | 479.15         | Rabbit | Validated                              |
| p53                     | TP53           | CST                 | 9282        | 481.3          | Rabbit | Under evaluation                       |
| p70S6K                  | RPS6KB1        | Epitomics           | 1494-1      | 493.1          | Rabbit | Validated                              |
| p70S6K_pT389            | RPS6KB1        | CST                 | 9205        | 494.7          | Rabbit | Validated                              |
| p90RSK                  | RPS6KA1        | CST                 | 9347        | 759.5          | Rabbit | Caution                                |
| p90RSK_pT359_S363       | RPS6KA1        | CST                 | 9344        | 770.2          | Rabbit | Use with Caution                       |
| Paxillin                | PXN            | Epitomics           | 1500-1      | 505.1          | Rabbit | Caution                                |
| PCNA                    | PCNA           | Abcam               | ab29        | 511.1          | Mouse  | Caution                                |
| PDCD4                   | PDCD4          | Rockland            | 600-401-965 | 816.1          | Rabbit | Use with Caution                       |
| PDK1                    | PDK1           | CST                 | 3062        | 515.5          | Rabbit | Validated                              |
| PDK1_pS241              | PDK1           | CST                 | 3061        | 516.7          | Rabbit | Validated                              |
| PEA15                   | PEA15          | CST                 | 2780        | 1017.2         | Rabbit | Validated                              |
| PEA15_pS116             | PEA15          | Invitrogen          | 44-836G     | 1018.1         | Rabbit | Validated                              |
| PI3K-p110-alpha         | PIK3CA         | CST                 | 4255        | 808.1          | Rabbit | Use with Caution                       |
| PI3K-p85                | PIK3R1         | Upstate (Millipore) | 06-195      | 523.3 or 523.4 | Rabbit | Validated                              |
| PKC-alpha               | PRKCA          | Upstate (Millipore) | 05-154      | 529.1          | Mouse  | Validated                              |
| PKC-alpha_pS657         | PRKCA          | Upstate (Millipore) | 06-822      | 530.2          | Rabbit | Use with caution                       |
| PKC-delta_pS664         | PRKCD          | Upstate (Millipore) | 07-875      | 932.1          | Rabbit | Validated                              |
| PKC-pan_BetaII_pS660    | PKC            | CST                 | 9371        | 1137.          | Rabbit | Validated                              |
| PR                      | PGR            | Epitomics           | 1483-1      | 549.1          | Rabbit | Validated                              |

|                  |                  |                     |            |        |        |                  |
|------------------|------------------|---------------------|------------|--------|--------|------------------|
| PRAS40_pT246     | AKT1S1           | Biosource           | 441100G    | 739.1  | Rabbit | Validated        |
| PTEN             | PTEN             | CST                 | 9552       | 566.3  | Rabbit | Validated        |
| Rab11            | RAB11A<br>RAB11B | CST                 | 3539       | 1083.3 | Rabbit | Under evaluation |
| Rab25            | RAB25            | CST                 | 4314       | 1150.1 | Rabbit | Validated        |
| Rad50            | RAD50            | Millipore           | 05-525     | 987.1  | mouse  | Validated        |
| Rad51            | RAD51            | Chem Biotech        | na 71      | 579.3  | Mouse  | Under evaluation |
| Raptor           | RPTOR            | CST                 | 2280       | 1128.8 | Rabbit | Validated        |
| Rb_pS807_S811    | RB1              | CST                 | 9308       | 557.9  | Rabbit | Validated        |
| RBM15            | RBM15            | SDI / Novus         | 21390002   | 1138.1 | Rabbit | Validated        |
| Rictor           | RICTOR           | CST                 | 2114       | 1129.4 | Rabbit | Use with Caution |
| Rictor_pT1135    | RICTOR           | CST                 | 3806       | 1130.4 | Rabbit | Validated        |
| S6_pS235_S236    | RPS6             | CST                 | 2211       | 600.8  | Rabbit | Validated        |
| S6_pS240_S244    | RPS6             | CST                 | 2215       | 601.4  | Rabbit | Validated        |
| SCD1             | SCD1             | Santa Cruz          | sc-58420   | 1127.1 | Mouse  | Validated        |
| SF2              | SFRS1            | Invitrogen          | 32-4500    | 1131.1 | Mouse  | Validated        |
| Smad1            | SMAD1            | Epitomics           | 1649-1     | 922.2  | Rabbit | Validated        |
| Smad3            | SMAD3            | Epitomics           | 1735-1     | 796.1  | Rabbit | Validated        |
| Smad4            | SMAD4            | Santa Cruz          | sc-7966    | 920.1  | Mouse  | Validated        |
| Src              | SRC              | Upstate (Millipore) | 05-184     | 621.2  | Mouse  | Validated        |
| Src_pY416        | SRC              | CST                 | 2101       | 623.18 | Rabbit | Use with caution |
| Src_pY527        | SRC              | CST                 | 2105       | 626.5  | Rabbit | Validated        |
| STAT3_pY705      | STAT3            | CST                 | 9131       | 637.6  | Rabbit | Validated        |
| STAT5-alpha      | STAT5A           | Epitomics           | 1289-1     | 638.1  | Rabbit | Validated        |
| Stathmin         | STMN1            | Epitomics           | 1972-1     | 718.1  | Rabbit | Validated        |
| Syk              | SYK              | Santa Cruz          | sc-1240    | 1033.1 | Mouse  | Validated        |
| TAZ              | WWTR1            | CST                 | 2149       | 777.1  | Rabbit | Validated        |
| TIGAR            | C12ORF5          | Epitomics           | S1711      | 1107.1 | Rabbit | Validated        |
| Transglutaminase | TGM2             | Lab Vision          | MS-224-P1  | 908.2  | Mouse  | Validated        |
| TRFC             | TRFC             | SDI / Novus         | 22500002   | 1140.1 | Rabbit | Validated        |
| TSC1             | TSC1             | CST                 | 4906       | 1125.1 | Rabbit | Use with Caution |
| TTF1             | TTF1             | Epitomics           | 2044-1     | 1081.1 | Rabbit | Validated        |
| Tuberin          | TSC2             | Epitomics           | 1613-1     | 670.30 | Rabbit | Validated        |
| Tuberin_pT1462   | TSC2             | CST                 | 3617       | 671.2  | Rabbit | Validated        |
| VEGFR2           | KDR              | CST                 | 2479       | 688.4  | Rabbit | Validated        |
| VHL              | VHL              | BD Biosciences      | 556347     | 693.1  | Mouse  | Use with Caution |
| XRCC1            | XRCC1            | CST                 | 2735       | 906.1  | Rabbit | Under evaluation |
| YAP              | YAP1             | Santa Cruz          | sc-15407   | 780.3  | Rabbit | Under evaluation |
| YAP_pS127        | YAP1             | CST                 | 4911       | 782.1  | Rabbit | Under evaluation |
| YB-1             | YBX1             | SDI                 | 1725.00.02 | 700.1  | Rabbit | Validated        |
| YB-1_pS102       | YBX1             | CST                 | 2900       | 835.1  | Rabbit | Validated        |

#### Validation Status\*

VALID=RPPA and WB correlation > 0.7

Use with Caution=RPPA and WB correlation < 0.7

Under Evaluation=Antibody has given mixed results and / or evaluated by another lab;  
we are in the process of (re)validating.

Table S5. Genes with copy number differences ( $P < 0.05$ ) between matched brain metastases ( $N=10$ ) and extracranial metastases ( $N=10$ )

| Number | Gene Symbol  | Chromosome | Start    | End      | Length | Event         | Freq. in BM (%) | Freq. in EM (%) |
|--------|--------------|------------|----------|----------|--------|---------------|-----------------|-----------------|
| 1      | ZMYM2        | chr13      | 19430809 | 19563968 | 133160 | One Copy Gain | 0               | 50              |
| 2      | GJA3         | chr13      | 19610394 | 19633183 | 22790  | One Copy Gain | 0               | 50              |
| 3      | GJB2         | chr13      | 19659603 | 19665114 | 5512   | One Copy Gain | 0               | 60              |
| 4      | SAP18        | chr13      | 20612652 | 20621224 | 8573   | One Copy Gain | 0               | 50              |
| 5      | SKA3         | chr13      | 20625733 | 20648741 | 23009  | One Copy Gain | 0               | 50              |
| 6      | MRP63        | chr13      | 20648371 | 20651220 | 2850   | One Copy Gain | 0               | 50              |
| 7      | LINC00539    | chr13      | 20775650 | 20816998 | 41349  | One Copy Gain | 0               | 50              |
| 8      | MIPEPP3      | chr13      | 20770263 | 20865061 | 94799  | One Copy Gain | 0               | 50              |
| 9      | ZDHHC20      | chr13      | 20844709 | 20931509 | 86801  | One Copy Gain | 0               | 50              |
| 10     | MICU2        | chr13      | 20964827 | 21076355 | 111529 | One Copy Gain | 0               | 50              |
| 11     | TNFRSF19     | chr13      | 23042508 | 23148244 | 105737 | One Copy Gain | 0               | 50              |
| 12     | MIPEP        | chr13      | 23202327 | 23361587 | 159261 | One Copy Gain | 0               | 50              |
| 13     | C1QTNF9B-AS1 | chr13      | 23361027 | 23364242 | 3216   | One Copy Gain | 0               | 50              |
| 14     | C1QTNF9B     | chr13      | 23363237 | 23369641 | 6405   | One Copy Gain | 0               | 50              |
| 15     | ANKRD20A19P  | chr13      | 23379422 | 23421454 | 42033  | One Copy Gain | 0               | 50              |
| 16     | SPATA13      | chr13      | 23451764 | 23779212 | 327449 | One Copy Gain | 0               | 50              |
| 17     | RNF17        | chr13      | 24236300 | 24352058 | 115759 | One Copy Gain | 0               | 50              |
| 18     | CENPJ        | chr13      | 24354411 | 24395027 | 40617  | One Copy Gain | 0               | 50              |
| 19     | TPTE2P1      | chr13      | 24400892 | 24440607 | 39716  | One Copy Gain | 0               | 50              |
| 20     | PABPC3       | chr13      | 24568275 | 24570704 | 2430   | One Copy Gain | 0               | 50              |
| 21     | AMER2        | chr13      | 24633816 | 24644421 | 10606  | One Copy Gain | 0               | 50              |
| 22     | MTMR6        | chr13      | 24718340 | 24759704 | 41365  | One Copy Gain | 0               | 50              |
| 23     | NUPL1        | chr13      | 24773665 | 24814561 | 40897  | One Copy Gain | 0               | 50              |
| 24     | ATP8A2       | chr13      | 24844208 | 25493420 | 649213 | One Copy Gain | 0               | 50              |
| 25     | BRCA2        | chr13      | 31787616 | 31871809 | 84194  | One Copy Gain | 0               | 50              |
| 26     | N4BP2L1      | chr13      | 31872859 | 31900315 | 27457  | One Copy Gain | 0               | 50              |
| 27     | CHRNA7       | chr15      | 30109977 | 30249676 | 139700 | One Copy Loss | 0               | 50              |
| 28     | TMCO5B       | chr15      | 31315968 | 31327048 | 11081  | One Copy Loss | 0               | 50              |
| 29     | RYR3         | chr15      | 31390468 | 31945595 | 555128 | One Copy Loss | 0               | 50              |
| 30     | AVEN         | chr15      | 31945719 | 32118595 | 172877 | One Copy Loss | 0               | 50              |
| 31     | CHRM5        | chr15      | 32048380 | 32144579 | 96200  | One Copy Loss | 0               | 50              |
| 32     | EMC7         | chr15      | 32163515 | 32181345 | 17831  | One Copy Loss | 0               | 50              |
| 33     | PGBD4        | chr15      | 32181565 | 32183883 | 2319   | One Copy Loss | 0               | 50              |
| 34     | KATNBL1      | chr15      | 32220166 | 32289589 | 69424  | One Copy Loss | 0               | 50              |
| 35     | EMC4         | chr15      | 32304489 | 32309658 | 5170   | One Copy Loss | 0               | 50              |
| 36     | SLC12A6      | chr15      | 32309488 | 32417557 | 108070 | One Copy Loss | 0               | 50              |
| 37     | NOP10        | chr15      | 32421208 | 32422654 | 1447   | One Copy Loss | 0               | 50              |
| 38     | NUTM1        | chr15      | 32422807 | 32437230 | 14424  | One Copy Loss | 0               | 50              |
| 39     | LPCAT4       | chr15      | 32438380 | 32446687 | 8308   | One Copy Loss | 0               | 50              |
| 40     | GOLGA8A      | chr15      | 32458561 | 32516959 | 58399  | One Copy Loss | 0               | 50              |
| 41     | GOLGA8B      | chr15      | 32604775 | 32663063 | 58289  | One Copy Loss | 0               | 50              |

Table S6 CNVs in 13 melanoma-related genes in 10 pairs of matched metastases

| Patient | CDKN2A               |                      | TBX2           |                | PTEN                 |               | BRAF           |                | AKT3           |                | MDM4           |                |
|---------|----------------------|----------------------|----------------|----------------|----------------------|---------------|----------------|----------------|----------------|----------------|----------------|----------------|
|         | BM                   | EM                   | BM             | EM             | BM                   | EM            | BM             | EM             | BM             | EM             | BM             | EM             |
| 03      | Homozygous Copy Loss | One Copy Loss        | None           | One Copy Gain  | Homozygous Copy Loss | One Copy Loss | One Copy Gain  | One Copy Gain  | One Copy Loss  | None           | None           | None           |
| 04      | None                 | None                 | One Copy Gain  | One Copy Gain  | None                 | None          | None           | None           | High Copy Gain | High Copy Gain | High Copy Gain | High Copy Gain |
| 05      | One Copy Loss        | One Copy Gain        | One Copy Gain  | One Copy Gain  | One Copy Loss        | One Copy Loss | High Copy Gain | High Copy Gain | One Copy Gain  | One Copy Gain  | One Copy Gain  | One Copy Gain  |
| 09      | None                 | One Copy Gain        | One Copy Gain  | One Copy Gain  | None                 | None          | None           | None           | None           | None           | None           | None           |
| 10      | One Copy Loss        | None                 | High Copy Gain | One Copy Gain  | One Copy Loss        | One Copy Gain | One Copy Gain  | One Copy Gain  | None           | One Copy Gain  | One Copy Gain  | None           |
| 11      | One Copy Loss        | Homozygous Copy Loss | One Copy Gain  | High Copy Gain | One Copy Loss        | One Copy Loss | None           | None           | High Copy Gain | High Copy Gain | High Copy Gain | One Copy Gain  |
| 12      | One Copy Loss        | One Copy Loss        | None           | None           | One Copy Loss        | One Copy Loss | High Copy Gain | High Copy Gain | One Copy Loss  | None           | None           | None           |
| 13      | One Copy Loss        | One Copy Loss        | One Copy Gain  | One Copy Gain  | None                 | None          | One Copy Gain  | One Copy Gain  | None           | None           | None           | None           |
| 15      | One Copy Loss        | One Copy Loss        | One Copy Gain  | High Copy Gain | One Copy Loss        | One Copy Loss | None           | One Copy Gain  | One Copy Gain  | None           | None           | None           |
| 16      | None                 | Homozygous Copy Loss | None           | None           | One Copy Loss        | One Copy Loss | One Copy Gain  |

| Patient | MYC           |                | MITF          |                | CCND1          |                | MDM2           |                | CDK4           |                | KIT            |                | TERT          |                      |
|---------|---------------|----------------|---------------|----------------|----------------|----------------|----------------|----------------|----------------|----------------|----------------|----------------|---------------|----------------------|
|         | BM            | EM             | BM            | EM             | BM             | EM             | BM             | EM             | BM             | EM             | BM             | EM             | BM            | EM                   |
| 03      | None          | None           | None          | One Copy Gain  | High Copy Gain | High Copy Gain | High Copy Gain | High Copy Gain | High Copy Gain | High Copy Gain | High Copy Gain | High Copy Gain | None          | None                 |
| 04      | One Copy Gain | One Copy Gain  | None          | None           | None           | None           | None           | None           | None           | None           | None           | None           | None          | None                 |
| 05      | None          | None           | None          | None           | None           | None           | None           | None           | None           | None           | None           | None           | One Copy Gain | None                 |
| 09      | One Copy Gain | One Copy Gain  | None          | One Copy Gain  | High Copy Gain | High Copy Gain | None           | None           | None           | None           | None           | None           | None          | None                 |
| 10      | One Copy Gain | None           | One Copy Gain | High Copy Gain | None           | None           | One Copy Loss  | None           | One Copy Loss  | None           | One Copy Loss  | None           | None          | None                 |
| 11      | None          | None           | None          | One Copy Gain  | One Copy Loss  | One Copy Loss  | None           | None           | None           | None           | None           | One Copy Gain  | One Copy Loss | Homozygous Copy Loss |
| 12      | None          | None           | One Copy Gain | None           | None          | None                 |
| 13      | None          | None           | None          | High Copy Gain | None           | None           | One Copy Gain  | None           | None           | None           | None           | None           | None          | None                 |
| 15      | One Copy Gain | One Copy Gain  | One Copy Gain | None           | None           | One Copy Gain  | One Copy Loss  | None           | One Copy Loss  | None           | None           | None           | None          | None                 |
| 16      | One Copy Gain | High Copy Gain | None          | None           | None           | None           | None           | None           | None           | None           | None           | None           | None          | None                 |

BM=brain metastasis

EM=extracranial metastasis

Table S7. Genes differently expressed between six pairs of matched brain and extracranial metastases ( $P < 0.01$ )

| Number | Gene symbol  | Linear ratio (BM/EM) | P-value  | FDR   | Probe ID     | Accession    |
|--------|--------------|----------------------|----------|-------|--------------|--------------|
| 1      | LOC100133298 | 1.75                 | 0.000234 | 0.422 | ILMN_3239361 | XM_001719906 |
| 2      | ANKRD20A1    | 1.66                 | 0.000237 | 0.422 | ILMN_2215824 | NM_032250    |
| 3      | TMEM119      | 0.36                 | 0.000271 | 0.422 | ILMN_1738116 | NM_181724    |
| 4      | HRK          | 0.49                 | 0.00032  | 0.422 | ILMN_2193706 | NM_003806    |
| 5      | CERK         | 0.64                 | 0.000569 | 0.422 | ILMN_1767475 | NM_022766    |
| 6      | SP100        | 1.57                 | 0.000751 | 0.422 | ILMN_2390586 | NM_001080391 |
| 7      | THY1         | 0.6                  | 0.000984 | 0.422 | ILMN_1779875 | NM_006288    |
| 8      | HBA2         | 8.26                 | 0.001031 | 0.422 | ILMN_2127842 | NM_000517    |
| 9      | LAMA4        | 1.54                 | 0.001156 | 0.422 | ILMN_1795442 | NM_002290    |
| 10     | TF           | 8.61                 | 0.001181 | 0.422 | ILMN_1768425 | NM_001063    |
| 11     | SGK3         | 1.9                  | 0.001213 | 0.422 | ILMN_2366703 | NM_170709    |
| 12     | FAM13B       | 1.61                 | 0.001339 | 0.422 | ILMN_3258795 | NM_001101800 |
| 13     | HBA2         | 8.2                  | 0.001416 | 0.422 | ILMN_1667796 | NM_000517    |
| 14     | TSHZ2        | 0.55                 | 0.001459 | 0.422 | ILMN_1655611 | NM_173485    |
| 15     | MFAP2        | 0.53                 | 0.001497 | 0.422 | ILMN_1787981 | NM_017459    |
| 16     | FLJ20444     | 1.52                 | 0.002294 | 0.422 | ILMN_1811181 | XM_933028    |
| 17     | AKAP7        | 1.96                 | 0.002357 | 0.422 | ILMN_1733690 | NM_004842    |
| 18     | TPP1         | 1.53                 | 0.002358 | 0.422 | ILMN_1729234 | NM_000391    |
| 19     | BRSK1        | 1.59                 | 0.002436 | 0.422 | ILMN_2185845 | NM_032430    |
| 20     | PDGFRA       | 0.52                 | 0.002476 | 0.422 | ILMN_2086470 | NM_006206    |
| 21     | LGI3         | 1.58                 | 0.002498 | 0.422 | ILMN_1737162 | NM_139278    |
| 22     | EMILIN2      | 1.73                 | 0.00255  | 0.422 | ILMN_1697268 | NM_032048    |
| 23     | FGFRL1       | 0.5                  | 0.002794 | 0.422 | ILMN_1795865 | NM_021923    |
| 24     | RN7SK        | 2.39                 | 0.003064 | 0.422 | ILMN_2074860 | NR_001445    |
| 25     | HBA1         | 6.53                 | 0.003181 | 0.422 | ILMN_3240144 | NM_000558    |
| 26     | HMOX1        | 3.54                 | 0.003232 | 0.422 | ILMN_1800512 | NM_002133    |
| 27     | MPZ          | 1.67                 | 0.003239 | 0.422 | ILMN_1810937 | NM_000530    |
| 28     | ENDOD1       | 1.55                 | 0.003294 | 0.422 | ILMN_1699022 | NM_015036    |
| 29     | SFRP2        | 0.38                 | 0.003378 | 0.422 | ILMN_1722898 | NM_003013    |
| 30     | ADORA3       | 2.33                 | 0.003456 | 0.422 | ILMN_1733259 | NM_001081976 |
| 31     | PHCA         | 1.51                 | 0.003578 | 0.422 | ILMN_1812552 | NM_018367    |
| 32     | CD68         | 1.57                 | 0.003843 | 0.422 | ILMN_2359907 | NM_001251    |
| 33     | HERC6        | 1.83                 | 0.004051 | 0.422 | ILMN_1654639 | NM_017912    |
| 34     | C8orf45      | 1.57                 | 0.004211 | 0.422 | ILMN_2113738 | NM_173518    |
| 35     | GDF15        | 1.82                 | 0.004416 | 0.422 | ILMN_2188862 | NM_004864    |
| 36     | PKIA         | 1.68                 | 0.004483 | 0.422 | ILMN_2337974 | NM_181839    |
| 37     | ADD3         | 1.71                 | 0.00452  | 0.422 | ILMN_1814526 | NM_001121    |
| 38     | OAS3         | 2.4                  | 0.004525 | 0.422 | ILMN_1745397 | NM_006187    |
| 39     | CD163        | 2.53                 | 0.00458  | 0.422 | ILMN_2379599 | NM_203416    |
| 40     | ELOVL2       | 1.75                 | 0.004922 | 0.422 | ILMN_1716843 | NM_017770    |
| 41     | HBB          | 7.14                 | 0.004988 | 0.422 | ILMN_2100437 | NM_000518    |
| 42     | SSX1         | 1.78                 | 0.00499  | 0.422 | ILMN_2247572 | NM_005635    |
| 43     | FGD5         | 0.59                 | 0.004996 | 0.422 | ILMN_2104141 | NM_152536    |
| 44     | KHDRBS3      | 1.68                 | 0.005552 | 0.422 | ILMN_1691747 | NM_006558    |
| 45     | OAS1         | 2.22                 | 0.005594 | 0.422 | ILMN_1675640 | NM_001032409 |



| Number | Gene symbol  | Linear ratio (BM/EM) | P-value  | FDR   | Probe ID     | Accession    |
|--------|--------------|----------------------|----------|-------|--------------|--------------|
| 46     | DPT          | 0.47                 | 0.00581  | 0.422 | ILMN_1708107 | NM_001937    |
| 47     | IFIT3        | 2.85                 | 0.0059   | 0.422 | ILMN_1701789 | NM_001031683 |
| 48     | OAS1         | 1.81                 | 0.006006 | 0.422 | ILMN_2410826 | NM_001032409 |
| 49     | SGSM2        | 1.53                 | 0.006012 | 0.422 | ILMN_1779171 | NM_014853    |
| 50     | VSIG4        | 2.03                 | 0.006083 | 0.422 | ILMN_1669409 | NM_007268    |
| 51     | PROM1        | 1.59                 | 0.006138 | 0.422 | ILMN_1786720 | NM_006017    |
| 52     | UBA7         | 1.94                 | 0.006258 | 0.422 | ILMN_1794612 | NM_003335    |
| 53     | VTRNA1-1     | 1.67                 | 0.006465 | 0.422 | ILMN_3309759 | NR_026703    |
| 54     | LOC644852    | 1.56                 | 0.006572 | 0.422 | ILMN_1727165 | XM_934218    |
| 55     | SPON1        | 0.5                  | 0.006647 | 0.422 | ILMN_1791890 | NM_006108    |
| 56     | NAV2         | 1.79                 | 0.006841 | 0.422 | ILMN_2399300 | NM_145117    |
| 57     | PODN         | 0.64                 | 0.006874 | 0.422 | ILMN_1770800 | NM_153703    |
| 58     | KHDRBS3      | 1.7                  | 0.006877 | 0.422 | ILMN_1727790 | NM_006558    |
| 59     | C2orf69      | 1.6                  | 0.007096 | 0.422 | ILMN_3236377 | NM_153689    |
| 60     | SYNGR1       | 0.62                 | 0.007125 | 0.422 | ILMN_1721712 | NM_145731    |
| 61     | RARRES2      | 0.38                 | 0.007134 | 0.422 | ILMN_1810844 | NM_002889    |
| 62     | CILP         | 0.56                 | 0.00719  | 0.422 | ILMN_2167758 | NM_003613    |
| 63     | PARP10       | 1.9                  | 0.007313 | 0.422 | ILMN_2262044 | NM_032789    |
| 64     | FLRT3        | 1.64                 | 0.007521 | 0.422 | ILMN_1805665 | NM_198391    |
| 65     | FLJ44124     | 1.59                 | 0.007668 | 0.422 | ILMN_2230162 | NM_001039755 |
| 66     | IRF7         | 2.01                 | 0.008074 | 0.422 | ILMN_1798181 | NM_004029    |
| 67     | SYNGR1       | 0.59                 | 0.008342 | 0.422 | ILMN_1810875 | NM_004711    |
| 68     | KIAA1751     | 1.57                 | 0.008459 | 0.422 | ILMN_2415979 | NM_001080484 |
| 69     | NQO1         | 2.01                 | 0.008558 | 0.422 | ILMN_1720282 | NM_000903    |
| 70     | STARD8       | 1.65                 | 0.008598 | 0.422 | ILMN_1799600 | NM_014725    |
| 71     | BIRC3        | 1.61                 | 0.008701 | 0.422 | ILMN_2405684 | NM_182962    |
| 72     | LOC100129211 | 1.52                 | 0.008725 | 0.422 | ILMN_3238053 | XM_001718981 |
| 73     | TXNIP        | 2.65                 | 0.008983 | 0.422 | ILMN_1697448 | NM_006472    |
| 74     | DMC1         | 1.55                 | 0.008989 | 0.422 | ILMN_2162367 | NM_007068    |
| 75     | CILP         | 0.34                 | 0.009093 | 0.422 | ILMN_1723847 | NM_003613    |
| 76     | FKBP4        | 0.65                 | 0.009112 | 0.422 | ILMN_1782045 | NM_002014    |
| 77     | RN7SK        | 4.98                 | 0.009259 | 0.422 | ILMN_1739423 | NR_001445    |
| 78     | SULT1A1      | 1.57                 | 0.009366 | 0.422 | ILMN_2404795 | NM_177530    |
| 79     | LMOD3        | 1.58                 | 0.009674 | 0.422 | ILMN_1785703 | NM_198271    |
| 80     | ERP27        | 2.01                 | 0.00969  | 0.422 | ILMN_1655261 | NM_152321    |
| 81     | DEF8         | 0.65                 | 0.009763 | 0.422 | ILMN_1656185 | NM_017702    |
| 82     | PHLDA3       | 1.84                 | 0.009763 | 0.422 | ILMN_1659106 | NM_012396    |
| 83     | ITM2A        | 1.5                  | 0.009765 | 0.422 | ILMN_2076600 | NM_004867    |
| 84     | GLDN         | 1.56                 | 0.009903 | 0.422 | ILMN_1704376 | NM_181789    |
| 85     | XAF1         | 2.34                 | 0.00994  | 0.422 | ILMN_2370573 | NM_199139    |
| 86     | MFAP5        | 0.46                 | 0.009983 | 0.422 | ILMN_1733415 | NM_003480    |

BM=brain metastasis, EM=extracranial metastasis

Linear ratio: calculated by dividing the mean expression of BM with the mean expression of EM

FDR: false discovery rate estimated by random permutation ( $N=10,000$ )
